## Current Bibliography.

Prepared by the Editor with the assistance of Miss Thursby-Pelham.

**N**OTE. The scope of the Bibliography is limited in the main to the area covered by the Council's activities, but there are included papers of general interest relating to other areas in the North Temperate and Arctic regions and exceptionally elsewhere. Limnological references are not as a rule given, but papers relating to brackish waters and to salmon and freshwater fish studied by the Council are included.

The classification of entries follows in a general way that adopted in Dr. Allen's Selected Bibliography published in Vol. I, Nos. 1 and 2 of the Journal, and since reprinted (Price, 1 Kr.).

Subscribers and those on the distribution list will receive regularly upon application to the Administrative Secretary copies of the Bibliography printed on one side of the page only, for use in making up card indices.

The Editor will be glad to be advised of emendations and additions to the Bibliography.

## Physical and Biological Conditions in the Sea.

### GENERAL HYDROGRAPHY

- Bergsten, F. Höjdbestämnings vid Sveriges Kuster medelst hydrografisk nivellerings. *Medd. Stat. Met.-Hydrogr. Anst.* VI, Nr. 4, Stockholm, 1935.
- de Buen, R. Caracteres oceanográficos del Estrecho de Gibraltar en 1932. *Notas y Resúmenes*, Ser. II, Núm. 83, Madrid, 1934.
- de Buen, R. Hidrografía del Estrecho de Gibraltar en Marzo de 1933 (Campañas del guardacostas Xauen). *Notas y Resúmenes*, Ser. II, Núm. 86, Madrid, 1934.
- Collin, L. Les vallées sous-marines du sud du Finistère. *Bull. Soc. d'Océanogr. de France*, XV, 1482—86, Paris, 1935.
- Defant, A. Das "Meteor"-Werk. *Forschgn. u. Fortschr.*, Heft 20/21, Berlin, 1935.
- Deutsche Seewarte. Das Sechzigste Jahr der Deutschen Seewarte, 1934. Hamburg, 1935.
- Dobrowolski, A. B. Sur les théories relatives au processus de la congélation des eaux, et en particulier, à celui de la formation de la "glace de courant", et de la glace de fond. *Bull. Soc. Géophys. de Varsovie*, Fasc. 11—12, 20—24, Warszawa, 1935. (In French, Polish Résumé).
- Loewe, F. Neue hydrographische Untersuchungen in Fjorden Ostgrönlands. Der tiefste Fjord der Erde. *Ann. der Hydrogr. usw.*, LXIII, 284—86, Berlin, 1935.
- Russia. *Compte-Rendu des Travaux de la IVe Conférence Hydrologique des États Baltiques*, Léningrad 1933. *Inst. Hydrol. d'État*, Léningrad, 1934.
- Sandström, J. W. Geophysische Untersuchungen im Nordatlantischen Meer. III. *Mitteilung. Gerlands Beitr. Geophys.*, XLIV, 300—05, Leipzig, 1935.

- Schott, G. *Geographie des Indischen und Stillen Ozeans*. Hamburg, 1935.
- Soule, F. M. and Hoyle, R. M. *International Ice Observation and Ice Patrol Service in the North Atlantic Ocean*. U. S. Treasury Dept., Coast Guard, Bull. No. 24, Washington, D. C., 1935.
- Terada, T. *On bathymetrical features of the Japan Sea*. Bull. Earthquake Res. Inst., XII, Part 4, Tokio, 1934.
- Thomsen, H., *Entstehung und Verbreitung einiger charakteristischer Wassermassen in dem Indischen und südlichen Pazifischen Ozean*. Ann. der Hydrogr. usw., LXIII, 293—305, Berlin, 1935.
- Thorade, H. *Henrik Mohn und die Entwicklung der Meereskunde*. Ann. der Hydrogr. usw., LXIII, 182—86, Berlin, 1935.
- Uriarte, L. B. y Mateu, E. B. *Observaciones oceanograficas realizadas durante 1932 en la Bahía de las Palmas (Canarias)*. Notas y Resúmenes, Ser. II, Núm. 77, Madrid, 1934.

### Physics and Chemistry of Sea Water.

- Carter, N. M., Moberg, E. G., Skogsberg, T. and Thompson, T. G. *The Reporting of Data in Oceanographical Chemistry*. Proc. 5th Pacific Sci. Congr., Victoria and Vancouver, B. C., Canada, 1933, III, 2123—27, Toronto and London, 1934.
- Sandström, J. W. *Geophysische Untersuchungen im Nordatlantischen Meer*. II. Mitteilung. Gerlands Beitr. Geophys., XLIV, 139—44, Leipzig, 1935.
- Sandström, J. W. *Geophysische Untersuchungen im Nordatlantischen Meer*. IV. Mitteilung. Gerlands Beitr. Geophys., XLV, 1—4, Leipzig, 1935.
- Thompson, T. G. and Robinson, R. J. *The Sea Water of the Puget Sound Region*. Proc. 5th Pacific Sci. Congr., Victoria and Vancouver, B. C., Canada, 1933, III, 2101—07, Toronto and London, 1934.

### TEMPERATURE AND SALINITY

- Bigelow, H. B. and Sears, M. *Studies of the Waters on the Continental Shelf, Cape Cod to Chesapeake Bay*. II. Salinity. Pap. Phys. Oceanogr. and Meteor., IV, No. 1, Cambridge, Mass., 1935.
- de Buen, R. *Régimen oceanográfico en el Mar de España y Costas de Portugal en Julio de 1933 (Campañas del Xauen)*. Notas y Resúmenes, Ser. II, Núm. 84, Madrid, 1934.
- Ercegovic, A. *Température, Salinité, Oxygène et Phosphates dans les eaux côtières de l'Adriatique oriental moyen*. Acta Adriatica, No. 5, Split, 1934.
- de las Heras, A. R. *Tablas para el Cálculo de la Densidad del Agua de Mar a 0° C., partiendo de las lecturas en el refractómetro de inmersión a diferentes temperaturas*. Notas y Resúmenes, Ser. II, Núm. 81, Madrid, 1934.
- Keeton, H. *The Sea Surface Temperature Distribution in the Indian Ocean*. Marine Observer, XII, 152, London, 1935.
- Miller, R. C. *Observations on Hydrogenion Concentration and Temperature of Surface Waters of Several Seas*. Proc. 5th Pacific Sci. Congr., Victoria and Vancouver, B. C., Canada, 1933, III, 2111—113, Toronto and London, 1934.
- Savage, R. E., More, A. and Lumby, J. R. *A Note on Amoebae living in a Sea Water Sample*. Journ. du Conseil, X, 185—86, Copenhagen, 1935.
- Schumacher, A. *Kippthermometertafeln, Neuberechnet auf Grund der Formeln von W. Hansen*. Ann. der Hydrogr. usw., LXIII, 237—39, Berlin, 1935.

### HYDROGEN ION-CONCENTRATION AND DISSOLVED GASES

- Miller, R. C. *Observations on Hydrogenion Concentration and Temperature of Surface Waters of Several Seas*. Proc. 5th Pacific Sci. Congr., Victoria and Vancouver, B. C., Canada, 1933, III, 2111—13, Toronto and London, 1934.
- Mitchell, P. H. and Taylor, I. R. *The Dissociation Constant of Cresol Red in Sea Water*. Journ. du Conseil, X, 169—72, Copenhagen, 1935.

### PHOSPHATES AND NITRATES

- Cooper, L. H. N. *The Rate of Liberation of Phosphate in Sea Water by the Break-down of Plankton Organisms*. Journ. Mar. Biol. Assoc., N. S. XX, 197—200, Plymouth, 1935.
- Ercegovic, A. *Température, Salinité, Oxygène et Phosphates dans les eaux côtières de l'Adriatique oriental moyen*. Acta Adriatica, No. 5, Split, 1934.
- Kalle, K. *Meereskundliche chemische Untersuchungen mit Hilfe des Zeiss'schen Pulfrich-Photometers*. V. Mitteilung. Die Bestimmung des Gesamt-Phosphor-

- gehaltenes, des Plankton-Phosphorgehaltes (lebende Substanz) und Trübungs-messungen. Ann. der Hydrogr. usw., LXIII, 195—204, Berlin, 1935.
- Maldura, C. M. Su l'unificazione dei metodi di analisi dei sali nutritivi e della silice in soluzione nell'acqua di mare. Boll. Pesca, Piscicoltura e Idrobiol., XI, 424—33, Roma, 1935.
- Seiwell, H. R. The Cycle of Phosphorus in the Western Basin of the North Atlantic. I. Phosphate Phosphorus. Pap. Phys. Oceanogr. and Meteor., III, No. 4, Cambridge, Mass., 1935.
- Seiwell, H. R. Phosphate in the Western Basin of the North Atlantic. Nature, CXXXVI, 206—08, London, 1935.

#### OTHER CONSTITUENTS

- Chauchard, P. Les facteurs de variation du pouvoir réducteur de l'eau de mer (Étude comparative de la teneur des eaux marines en matières organiques dissoutes). Ann. Inst. Océanogr., N. S. XV, 329—410, Paris, 1935.
- Cooper, L. H. N. A Note on Manganese in Marine Plankton. Journ. Mar. Biol. Assoc., N. S. XX, 201—02, Plymouth, 1935.
- Hernegger, F. and Karlik, B. Uranium in Sea-Water. Göteborgs. Kungl. Vetenskaps- och Vitterhets-Samhälles Handlingar, Femte Följden, Ser. B, IV, No. 12, Göteborg, 1935.
- Maldura, C. Su l'unificazione dei metodi di analisi dei sali nutritivi e della silice in soluzione nell'acqua di mare. Boll. Pesca, Piscicoltura e Idrobiol., XI, 424—33, Roma, 1935.
- Thompson, T. G. and Wilson, T. L. The Occurrence and Determination of Manganese in Sea Water. Journ. Amer. Chem. Soc., LVII, 233, Easton, Pa., 1935.

#### Currents.

- Arakawa, H. and Ooma, S. On the general circulations of the Ocean. Geophys. Mag., IX, No. 1, Tokio, 1935.
- Barlow, E. W. The 1910 to 1935 Survey of the Currents of the Indian Ocean and China Seas. Marine Observer, XII, 153—63, London, 1935.
- Carruthers, J. N. A "Vertical Log" Current-Meter. Journ. du Conseil, X, 151—68, Copenhagen, 1935.
- Carruthers, J. N. The Flow of Water through the Straits of Dover, as gauged by Continuous Current-Meter Observations at the Varne Lightvessel (50°56' N. — 1°17' E.). Part II. Second Report on Results Obtained. Min. of Agric. and Fish., Fish. Invest., Ser. II, XIV, No. 4, London, 1935.
- Ertel, H. Über die Beziehung zwischen Tangentialdruck des Windes und Oberflächenstrom in V. W. Ekman's Theorie stationärer Triftströme. Gerlands Beitr. Geophys., XLIV, 225—26, Leipzig, 1935.
- Hachey, H. B. The circulation of Hudson Bay Water as indicated by Drift Bottles. Science, N. S. LXXXII, 275—76, U. S. A., 1935.
- Pettersson, H. and Malmheden, H. W. Eddy-Viscosity in Stratified Water. II. Göteborgs Kungl. Vetenskaps- och Vitterhets-Samhälles Handlingar, Femte Följden, Ser. B, IV, No. 8, Göteborg, 1935.
- van Riel, P. M. The bottom configuration in relation to the flow of the bottom water. The "Snellius" Exped. etc. 1929—30, Vol. II, Oceanogr. Results, Part 2, Soundings and bathymetric charts, Chapt. II, Utrecht, 1934.
- Rosby, C. G. and Montgomery, R. B. The layer of frictional influence in wind and ocean currents. Pap. in Phys. Oceanogr. and Meteor., III, Nr. 3, Cambridge, Mass., 1935.
- Russell, F. S. On the Value of Certain Plankton Animals as Indicators of Water Movements in the English Channel and North Sea. Journ. Mar. Biol. Assoc., N. S. XX, 309—32, Plymouth, 1935.
- Thorade, H. Vereinfachte Berechnung von Meeresströmungen. Ann. der Hydrogr. usw., LXIII, 315—16, Berlin, 1935.
- Thorade, H. Untersuchung von Strömungen mittels der Kontinuitätsgleichung. Ann. der Hydrogr. usw., LXIII, 316—17, Berlin, 1935.
- Wendler, O. H. Die Oberflächenbewegungen des Guineastromes. Gerlands Beitr. Geophys., XLIV, 176—98, Leipzig, 1935.

#### Tides.

- Admiralty. The Admiralty Tide Tables (Standard Edition) Part I, for 1935. London, 1934.

- Admiralty. The Admiralty Tide Tables (Abridged Edition) Part I, for 1935. London, 1934.
- Admiralty. The Admiralty Tide Tables (Standard Edition) Part I, for 1936. London, 1935.
- Admiralty. The Admiralty Tide Tables (Abridged Edition) Part I, for 1936. London, 1935.
- Ertel, H. Über die Beziehung zwischen Tangentialdruck des Windes und Oberflächenstrom in V. W. Ekman's Theorie stationärer Triftströme. Gerlands Beitr. Geophys., XLIV, 225—26, Leipzig, 1935.
- Lüders, K. Grundsätzliches über die Beziehungen zwischen Gezeitenstrom einerseits und Wandermaterial und Sediment andererseits. Ann. der Hydrogr. usw., LXIII, 189—95, Berlin, 1935.
- Navarro, F. de P. Sobre la existencia de ondas de marea interna en el Mediterraneo y generalizacion de la importancia de este fenómeno en los estudios oceanográficos. Trab. Inst. Español de Oceanogr., Núm. 12, Madrid, 1934.
- Okada, M. and Miyosi, K. Experimental Studies of the Water Movement in Coastal Regions of the Sea. II. Tidal Oscillations in Sagami Bay. (II). Journ. Imp. Fish. Inst., XXX, 253—63, Tokyo, 1935.

#### WIND

- Carruthers, J. N. A suggested Totalising Anemometer for Oceanographers. Hydrogr. Review, XII, No. 1, 33—38, Monaco, 1935.
- Ertel, H. Über die Beziehung zwischen Tangentialdruck des Windes und Oberflächenstrom in V. W. Ekman's Theorie stationärer Triftströme. Gerlands Beitr. Geophys., XLIV, 225—26, Leipzig, 1935.
- Perlewitz, P. Der Wind nach Beaufortstärke und Geschwindigkeit. Hansa, Nr. 12, Hamburg, 1935.

#### LIGHT, COLOUR AND TRANSPARENCY

- Utterback, C. L. Submarine Illumination. Proc. 5th Pacific Sci. Congr., Victoria and Vancouver, B. C., Canada, 1933, III, 2153—58, Toronto and London, 1934.

#### Oceanography-Miscellaneous.

- Baulig, H. The Changing Sea Level. Inst. British Geographers, Publ. No. 3, London, 1935.
- Defant, A. The Atlantic Expedition of the "Meteor". Research and Progress, I, 117—23, Berlin, 1935.
- Derjugin, C. M. Exploration des Mers de l'Extrême-Orient. Bull. Soc. d'Océanogr. de France, XV, 1473—81, Paris, 1935.
- Lewis, R. C. The Orography of the North Sea Bed. Geogr. Journ., LXXXVI, 334—42, London, 1935.
- Schütte, H. Die Senkung der deutschen Nordseeküste. Geogr. Anz., Heft 10, Gotha, 1935.
- Tåning, A. V. Blade af "Dana's" Dagbog. Nordisk Havfiskeri Tidsskr., 9. Aarg., Nr. 7, 3—5, København, 1935.

#### Plankton.

- Bertolini, F. Note sulla sistematica dei *Phylliroidea*. Pubbl. Staz. Zool. di Napoli, XV, 60—70, Roma, 1935.
- Braarud, T. The "Øst" Expedition to the Denmark Strait 1929. II. The Phytoplankton and its Conditions of Growth (including some qualitative data from the Arctic in 1930). Hvalrådets Skr., Nr. 10, Oslo, 1935.
- de Buen, F. Resultados de la primera campaña biológica a bordo del "Xauen" en aguas de Mallorca (Abril 1933). Trab. Inst. Español de Oceanogr., Núm. 6, 7—72, Madrid, 1934.
- Coe, W. R. Bathypelagic Nemerteans collected with a 25 mile circle near Bermuda. Zool. Anz., CXI, 315—17, Leipzig, 1935.
- Cooper, L. H. N. The Rate of Liberation of Phosphate in Sea Water by the Break-down of Plankton Organisms. Journ. Mar. Biol. Assoc., N. S. XX, 197—200, Plymouth, 1935.
- Cooper, L. H. N. A Note on Manganese in Marine Plankton. Journ. Mar. Biol. Assoc., N. S. XX, 201—02, Plymouth, 1935.

- Frost, W. E. Larval Stages of the Euphausiids *Nematoscelis megalops* (G. O. Sars) and *Stylocheiron longicornis* (G. O. Sars) taken off the south-west coast of Ireland. Proc. Roy. Irish Acad., XLII, Section B, 443—58, Dublin, 1935.
- Germain, L. La mer des Sargasses. Bull. Inst. Océanogr., No. 671, Monaco, 1935.
- Giambra, R. Alcune Peridinee nel mare di Palermo. Boll. Pesca, Piscicult. e Idrobiol., XI, 33—35, Roma, 1935.
- Graham, H. W. The Distribution of the Plankton of the Pacific as related to some physical and chemical conditions of the water. Proc. 5th Pacific Sci. Congr., Victoria and Vancouver B. C., Canada, 1933, III, 2035—43, Toronto and London, 1934.
- Hart, E. G. Some Devices for the Manipulation of Marine Plankton Collections on board ship. Journ. du Conseil, X, 173—78, Copenhagen, 1935.
- Harvey, H. W. Note concerning a Measuring Plankton-Net. Journ. du Conseil, X, 179—84, Copenhagen, 1935.
- Harvey, H. W., Cooper, L. H. N., Lebour, M. V. and Russell, F. S. Plankton Production and its Control. Journ. Mar. Biol. Assoc., N. S. XX, 407—41, Plymouth, 1935.
- Jespersen, P. Quantitative Investigations on the Distribution of Macroplankton in different Oceanic Regions. Carlsberg Foundation's Oceanogr. Exped. round the World, 1928—30, etc., Dana Report No. 7, Copenhagen, 1935.
- Johnsen, M. W. The Life History of the Copepod *Tortanus discaudatus* (Thompson and Scott). Biol. Bull., Woods Hole, Mass., LXVII, 182—200, 1934.
- Johnson, M. W. The developmental stages of the Copepod *Epilabidocera amphitrites* McMurrich. Biol. Bull., Woods Hole, Mass., LXVII, 466—83, 1934.
- Künne, C. Über *Leptomysis mediterranea* G. O. Sars in der Deutschen Bucht der Nordsee. Zool. Anz., CXI, 158—60, Leipzig, 1935.
- Lebour, M. V. *Hemiusurus communis* in *Acartia*. Journ. Mar. Biol. Assoc., N. S. XX, 371—72, Plymouth, 1935.
- Lebour, M. V. The *Echinospira* Larvae (Mollusca) of Plymouth. Proc. Zool. Soc. London, 1935, Part I, 163—74, 1935.
- Loosli, M. Über die Entwicklung und den Bau der indifferenten und männlichen Larven von *Bonellia viridis* Rol. Pubbl. Staz. Zool. di Napoli, XV, 16—59, Roma, 1935.
- Marshall, S. M. The Silicoflagellata and Tintinninoidea. Great Barrier Reef Exped., 1928—29, Sci. Rep. IV, No. 15, Brit. Mus. (Nat. Hist.) London, 1934.
- Pearson, J. C. Eggs of a Peneid Shrimp. Science, LXXXII, 172, New York, 1935.
- Phifer, L. D. Periodicity of Diatom Growth in the San Juan Archipelago. Proc. 5th Pacific Sci. Congr., Victoria and Vancouver, B. C., Canada, 1933, III, 2047—49, Toronto and London, 1934.
- Phifer, L. D. Vertical Distribution of Diatoms in the Strait of Juan de Fuca. Univ. Washington Public. Oceanogr., I, 83—96, Seattle, 1934.
- Phifer, L. D. Phytoplankton of East Sound, Washington, February to November, 1932. Univ. Washington Public. Oceanogr., I, 97—110, Seattle, 1934.
- Rose, M. Recherches préliminaires sur le Plankton de Profondeur de la Baie d'Alger. Bull. Stat. d'Aquicult. et de Pêche de Castiglione, 1933, Ier Fasc., 43—81, Alger, 1934.
- Russell, F. S. On the Value of Certain Plankton Animals as Indicators of Water Movements in the English Channel and North Sea. Journ. Mar. Biol. Assoc., N. S. XX, 309—32, Plymouth, 1935.
- Schreiber, G. Ricerche biometriche sui Radiolari. I. Variabilità e distribuzione del *Challengeron diodon* Haeckel. Pubbl. Staz. Zool. di Napoli, XV, 1—15, Roma, 1935.
- Thiel, M. E. Zur Kenntnis der Hydromedusenfauna des Schwarzen Meeres. Zool. Anz., CXI, 161—74, Leipzig, 1935.

#### CONDITIONS OF PRODUCTION IN THE SEA

- Dakin, W. J. and Colefax, A. N. Plankton Production and the Nitrate Nitrogen and Phosphate Cycles in the Pacific Ocean off New South Wales. Nature, CXXXVI, 339, London, 1935.
- Keys, A., Christensen, E. H. and Krogh, A. The Organic Metabolism of Sea Water with Special Reference to the Ultimate Food Cycle in the Sea. Journ. Mar. Biol. Assoc., N. S. XX, 181—96, Plymouth, 1935.

**Marine Bacteria.**

- Bertel, R. Les bactéries marines et leur influence sur la circulation de la matière dans la mer. Bull. Inst. Océanogr., No. 672, Monaco, 1935.
- Kimata, M. The Relation between the Growth of Bacteria and the Agar-Concentration of the Medium. Bull. Jap. Soc. Sci. Fish., IV, 79—81, Tokyo, 1935. (In English).
- Lipska, I. Les colibacilles et les coliphages chez les animaux invertébrés marins. Bull. Inst. Océanogr., No. 675, Monaco, 1935.
- Savage, R. E., More, A. and Lumby, J. R. A Note on Amoebae living in a Sea Water Sample. Journ. du Conseil, X, 185—86, Copenhagen, 1935.
- Zobell, C. E. and Allen, E. C. The Significance of Marine Bacteria in the Fouling of Submerged Surfaces. Journ. Bacteriol. XXIX, 239—51, Baltimore, 1935.

**Marine Plants.**

- Chamagne, G. Les algues marines dans les carences alimentaires. Rev. Path. Comp. et Hyg. Gén. XXXIII, 172—75, Paris, 1933.
- Ercegovic, A. Wellengang und Lithophytenzone an der ostadriatischen Küste. Acta Adriatica, No. 3, Split, 1934.
- Haas, P. The liberation of methyl sulphide by seaweed. Biochem. Journ., XXIX, 1297—99, London, 1935.
- Haas, P. and Russell-Wells, B. A note on the phosphorus content of marine algae. Biochem. Journ., XXIX, 1915—17, London, 1935.
- Heilbron, I. M. and Phipers, R. F. The algae. I. The lipochromes of *Fucus vesiculosus*. Biochem. Journ. XXIX, 1369—75, London, 1935.
- Heilbron, I. M., Parry, E. G. and Phipers, R. F. The algae. III. The relationship between certain algal constituents. Biochem. Journ., XXIX, 1376—81, London, 1935.
- Heilbron, I. M., Parry, E. G. and Phipers, R. F. The algae. III. The isolation of lactoflavin. Biochem. Journ. XXIX, 1382—83, London, 1935.
- Herpin, R. La flore et la faune d'un vieux bateau. Bull. Inst. Océanogr., No. 682, Monaco, 1935.
- Knight, M., Blackler, M. C. H., and Parke, M. W. Notes on the Lifecycle of species of *Asperococcus*. Proc. and Trans. Liverpool Biol. Soc., XLVIII, 79—97, 1935.
- Prat, S. Stimulation Plasmolysis on Marine Algae. Acta Adriatica, No. 4, Split, 1934.
- Rees, T. K. The Marine Algae, of Lough Ine. Journ. Ecol., XXIII, 69—133, Cambridge, 1935.
- Rigg, G. B. Some Properties of Kelp Colloids. Proc. 5th Pacific Sci. Congr., Victoria and Vancouver, B. C., Canada, 1933, III, 2115—21, Toronto and London, 1934.
- Smith, H. G. On the Presence of Algae in certain *Ascidacea*. Ann. and Mag. Nat. Hist., 10th Ser., XV, 615—26, London, 1935.
- Tschudy, R. H. Depth Studies on Photosynthesis of the Red Algae. Amer. Journ. Botany, XXI, 546—56, Lancaster, 1934.
- Uriarte, L. B. Primera Campaña biológica a bordo del "Xauen" en aguas de Mallorca (Abril 1933). Algas. Trab. Inst. Español de Oceanogr., Núm. 7, 73—74, Madrid, 1934.

**Bottom Deposits.**

- Hanzawa, S. Diatom (*Ethmodiscus*) Ooze obtained from the Tropical Southwestern North Pacific Ocean. Rec. Oceanogr. Works in Japan, VII, 37—44, Tokyo, 1935.
- Krejci-Graf, K. Beobachtungen am Tropenstrand. I—IV. Senckenbergiana, XVII, 21—61, Frankfurt a. M., 1935.
- Kupfer, K. R. Klingender Sand an den ostbaltischen Küsten. Korrespondenzblatt d. Naturf.-Vereins, LXI, Riga, 1934.
- Lüders, K. Grundsätzliches über die Beziehungen zwischen Gezeitenstrom einerseits und Wandermaterial und Sediment andererseits. Ann. der Hydrogr., usw., LXIII, 189—95, Berlin, 1935.
- Revelle, R. Preliminary Remarks on the Deep-Sea Bottom Samples collected in the Pacific on the last Cruise of the Carnegie. Journ. Sedimentary Petrology, V, 37—39, Tulsa, Okla., 1935.
- Schwarz, A. Der tierische Einfluss auf die Meeressedimente. Senckenbergiana, XIV, Frankfurt a. M., 1932.
- Steuer, A. The Fishery Bottoms of Alexandria in Egypt. Research and Progress, I, 136—38, Berlin, 1935.

- Tarasov, N. J. Celluloid Tubes for Sampling Cores of Deep Sea Mud. *Nature*, CXXXVI, 263, London, 1935.
- van Veen, J. Sand Waves in the North Sea. *Hydrogr. Rev.*, XII, No. 1, 21—29, Monaco, 1935.

### Bottom Fauna.

#### GENERAL

- de Buen, F. Resultados de la primera campaña biológica a bordo del "Xauen" en aguas de Mallorca (Abril 1933). *Trab. Inst. Español de Oceanogr.* Núm. 6, 7—72, Madrid, 1934.
- Fraser, J. H. The Fauna of the Liverpool Bay Shrimping Grounds and the Morecambe Bay Prawning Grounds as revealed by the use of a Beam Trawl. *Proc. and Trans. Liverpool Biol. Soc.*, XLVIII, 65—78, Liverpool, 1935.
- Herpin, R. La Flore et la Faune d'un vieux bateau. *Bull. Inst. Océanogr.*, No. 682, Monaco, 1935.
- Stephen, A. C. Notes on the Intertidal Fauna of North Uist. *Scottish Naturalist*, No. 215, 137—42, Edinburgh, 1935.

#### PHYSIOLOGY AND BEHAVIOUR

- Bacq, Z. M. Occurrence of Unstable Choline Esters in Invertebrates. *Nature*, CXXXVI, 30—31, London, 1935.
- Baldwin, E. Phosphagen in the Electrical Organ of *Torpedo*. *Journ. Exper. Biol.*, X, 212—21, London, 1933.
- Baldwin, E. On the Cephalopod Phosphagen. *Journ. Exper. Biol.* X, 222—29, London, 1933.
- Barnes, T. C. Salt requirements and space orientation of the Littoral Isopod *Ligia* in Bermuda. *Biol. Bull.*, Woods Hole, Mass., LXIII, 496—504, 1932.
- Barnes, T. C. The Validity of the "All or None" Law in the Peripheral Nervous System of Crustacea. *Amer. Journ. Physiol.*, CVII, 447—58, Boston, 1934.
- Barnes, T. C. Further Observations on the Salt Requirements of *Ligia* in Bermuda. *Biol. Bull.*, Woods Hole, Mass., LXVI, 124—32, 1934.
- Bateman, J. B. Osmotic and Ionic Regulation in the Shore Crab, *Carcinus maenas*, with Notes on the Blood Concentrations of *Gammarus locusta* and *Ligia oceanica*. *Journ. Exper. Biol.*, X, 355—71, London, 1933.
- Benazzi, M. Sull'automatismo del cuore dei Tunicati. *Pubbl. Staz. Zool. di Napoli*, XV, 106—19, Roma, 1935.
- Cole, K. S. Electric Impedance of Hipponeö Eggs. *Journ. Gen. Physiol.*, XVIII, 877—87, Baltimore, 1935.
- Cowan, S. L. The CO<sub>2</sub> Dissociation Curves and the Buffering of Crab's Muscle and Nerve Preparations. *Journ. Exper. Biol.*, X, 401—11, London, 1933.
- Dakin, W. J. Presidential Address. The Aquatic Animal and its Environment. *Proc. Linnean Soc. N. S. Wales*, LX, Parts 1—2, VII—XXXII, Sydney, 1935.
- Dakin, W. J. and Edmonds, E. The regulation of the salt contents of the blood of aquatic animals, and the problem of the permeability of the bounding membranes of aquatic invertebrates. *Australian Journ. Exper. Biol. and Med. Sci.*, VIII, 169—87, Adelaide, 1931.
- Dijkgraaf, S. Über Hautlichtempfindlichkeit bei *Aplysia limacina*. *Zool. Anz.*, CXI, 254—56, Leipzig, 1935.
- Dobrefi, M. Ein Neues Versuchsobjekt zur unmittelbaren Erforschung des Blutkreislaufes und des Magendarmtraktes. *Pubbl. Staz. Zool. di Napoli*, XV, 120—22, Roma, 1935.
- Drilhon, A. Le glucose et la mue des Crustacés. *C. R. Acad. Sci. Paris*, CXCVI, 506—08, Paris, 1933.
- Drilhon, A. Le phosphore et la mue des Crustacés. *C. R. Acad. Sci. Paris*, CXCVI, 725—26, Paris, 1933.
- Fox, H. M. and Johnson, M. L. The Control of Respiratory Movements in Crustacea by Oxygen and Carbon Dioxide. *Journ. Exper. Biol.*, XI, 1—10, London, 1934.
- Heilbron, I. M., Jackson, H. and Jones, R. N. The lipochromes of sea anemones. I. Carotenoid pigments of *Actinia equina*, *Anemonia sulcata*, *Actinoloba dianthus* and *Tealia felina*. *Biochem. Journ.*, XXIX, 1384—88, London, 1935.
- Lang, D. and Yonge, C. M. The Function of the Tegumental Glands in the Statocyst of *Homarus vulgaris*. *Journ. Mar. Biol. Assoc.*, N. S. XX, 333—39, Plymouth, 1935.
- Lowenstein, O. The Respiratory Rate of *Gammarus chevreuxi* in relation to differences in Salinity. *Journ. Exper. Biol.*, XII, 217—21, London, 1935.

- MacBride, E. W. An ancestral habit in a Sea-Urchin. *Nature*, CXXXV, 995, London, 1935.
- Needham, A. E. A useful application of the principle of heterogonic growth. *Nature*, CXXXVI, 433—34, London, 1935.
- Neu, W. Mitteilung einiger Beobachtungen zur Formbildung von *Balanus balanoides* L. und dessen Ansiedlung. *Zool. Anz.*, CX, 169—79, Leipzig, 1935.
- Pantin, C. F. A. On the Excitation of Crustacean Muscle. I. *Journ. Exper. Biol.*, XI, 11—27, London, 1934.
- Ramult, M. Observations on the embryonic and larval development in *Sacculina* (Rhizocephala) in changed osmotic conditions of medium. *Bull. Acad. Polonaise des Sci. et Lett.*, 87—109, Cracovie, 1935.
- Scharrer, B. Über das Hanströmsche Organ X bei Opisthobranchiern. *Pubbl. Staz. Zool. di Napoli*, XV, 132—42, Roma, 1935.
- Schlieper, C. Neuere Ergebnisse und Probleme aus dem Gebiet der Osmoregulation wasserlebender Tiere. *Biol. Rev.*, X, 334—60, Cambridge, 1935.
- Stephenson, T. A., Zoon, A. and Eyre, J. The Liberation and Utilisation of Oxygen by the Population of Rock-pools. *Journ. Exper. Biol.*, XI, 162—72, London, 1934.
- Takahashi, T. Distribution of Trimethylaminoxide in the Piscine and Molluscan Muscles. *Bull. Japan. Soc. Sci. Fish.*, IV, 91—94, Tokyo, 1935. (In Japanese, English Résumé).
- Trawinski, A. Études sur la putréfaction de la chair des Mollusques comestibles. *Bull. Inst. Océanogr.*, No. 683, Monaco, 1935.
- Welsh, J. H. The Structure and Reactions of the Tentacles of *Terebella magnifica* W. *Biol. Bull.*, Woods Hole, Mass., LXVI, 339—45, 1934.
- Welsh, J. H. The Concentration of Eosin and the photodynamic effect on Tentacles of a Terebellid Worm. *Biol. Bull.*, Woods Hole, Mass., LXVI, 346—50, 1934.
- Welsh, J. H. Further Evidence of a Diurnal Rhythm in the Movement of Pigment Cells in Eyes of Crustaceans. *Biol. Bull.*, Woods Hole, Mass., LXVIII, 247—52, 1935.
- Yonge, C. M. On some Aspects of Digestion in Ciliary Feeding Animals. *Journ. Mar. Biol. Assoc.*, N. S. XX, 341—46, Plymouth, 1935.
- Zerling, M. R. Action de la Thyroxine et de quelques substances chimiquement voisines sur le développement des larves d'Oursin. *Bull. Inst. Océanogr.*, No. 678, Monaco, 1935.

## SPECIAL GROUPS

- Abe, N. The age and growth of the limpet (*Acmaea dorsuosa* Gould) *Sci. Rep. Tohoku Imp. Univ.*, 4th Ser. (Biol.), VII, 347—63, 1932.
- Ankel, W. E. Die Pantoffelschnecke, ein Schädling der Auster. *Natur und Volk*, LXV, 173—76, Frankfurt a. M., 1935.
- Burton, M. Notes on British Sponges, with a description of a new Genus and Species. *Ann. and Mag. Nat. Hist.*, 10th Ser., XV, 651—53, London, 1935.
- Cole, H. A. On some larval Trematode Parasites of the Mussel (*Mytilus edulis*) and the Cockle (*Cardium edule*). *Parasitology*, XXVII, 276—80, Cambridge, 1935.
- O'Donoghue, C. H. Bryozoa encrusting the Hairy Porcelain Crab. *Ann. and Mag. Nat. Hist.*, 10th Ser., XVI, 390—92, London, 1935.
- Greig, J. A. Some Echinoderms from Franz-Josef Land, Victoriaøya and Hopen, collected on the Norwegian Scientific Expedition 1930. *Norges Svalbard- og Ishavs-Undersøkelser*, Medd. Nr. 26, Oslo, 1935.
- Guberlet, J. E. Observations on the spawning and development of some Pacific Annelids. *Proc. 5th Pacific Sci. Congr.*, Victoria and Vancouver, B. C. Canada 1933, V, 4213—220, Toronto and London, 1934.
- Heding, S. G. Holothurioidea. Part I. Apoda. Molpadioidea. Gephyrothurioidea. The Danish Ingolf-Exped., IV, Part 9, Copenhagen, 1935.
- Hernandez, F. F. Primera Campaña biológica a bordo del "Xauen" en aguas de Mallorca (Abril 1933). *Esponjas. Notas y Resúmenes*, Ser. II, Núm. 80, Madrid, 1934.
- Hertling, H. Seehase (Aplysia) bei Helgoland. *Natur und Volk*, LXV, 103—04, Frankfurt a. M., 1935.
- Hescheler, K. Erklärungen zu der Arbeit von Ernst Seen, die Geschlechtsverhältnisse der Brachiopoden usw. *Zool. Anz.*, CX, 332—33, Leipzig, 1935.
- Hiro, F. A Study of Cirripeds associated with Corals occurring in Tanabe Bay. *Rec. Oceanogr. Works in Japan*, VII, 45—72, Tokyo, 1935.
- Ino, T. Shell Variations of *Cellana toreuma* (Reeve) in relation to the environments. *Bull. Japan. Soc. Sci. Fish.*, IV, No. 1, 31—36, Tokyo, 1935. (In Japanese, English Résumé).



- Johnson, M. W. and Miller, R. C. The Seasonal Settlement of Shipworms, Barnacles, and other Wharf-Pile Organisms at Friday Harbor, Washington. Univ. Washington, Public. Oceanogr., II, 1—18, Seattle, 1935.
- Joubin, L. Sur un Coralliaire rare de la Baie de Castiglione (*Cladocera patriarca* Pourtales). Bull. Stat. d'Aquicult. et de Pêche de Castiglione, 1933, 1er Fasc., 35—43, Alger, 1934.
- Lamy, E. Sobre algunos Moluscos procedentes de las Campañas del Instituto Español de Oceanografía. Notas y Resúmenes, Ser. II, Núm. 78, Madrid, 1934.
- Lamy, E. Primera Campaña biológica a bordo del "Xauen" en aguas de Mallorca (Abril 1933). Moluscos. Trab. Inst. Español de Oceanogr., Núm. 6, 80—82, Madrid, 1934.
- Lebour, M. V. The Breeding of *Littorina neritoides*. Journ. Mar. Biol. Assoc., N. S. XX, 373—78, Plymouth, 1935.
- Magaz, J. Catálogo provisional de los Moluscos Cefalópodos vivientes en las costas de la Península Ibérica y Baleares. Notas y Resúmenes, Ser. II, Núm. 82, Madrid, 1934.
- Meyer, P. F. Wachstums- und Altersuntersuchungen an der Nordseekrabbe (*Granat*) *Crangon vulgaris* Fabr. Zool. Anz., CXI, 145—52, Leipzig, 1935.
- de Miranda, A. Primera Campaña biológica a bordo del "Xauen" en aguas de Mallorca (Abril 1933). Crustaceos Decapodos. Trab. Inst. Español de Oceanogr., Núm. 6, 75—79, Madrid, 1934.
- Moore, H. B. The Biology of *Balanus balanoides*. III. The Soft Parts. IV. Relation to Environmental Factors. Journ. Mar. Biol. Assoc., N. S. XX, 263—307, Plymouth, 1935.
- Mortensen, Th. A Monograph of the Echinoidea. I and II, Text and Plates. Copenhagen and London, 1928 and 1935.
- Mortensen, Th. Ophiuroidea. The Danish Ingolf-Exped., IV, Part 8, Copenhagen, 1933.
- Murayama, S. On the development of Japanese Abalone, *Haliotis gigantea*. Journ. Coll. Agricult., Tokyo Imp. Univ., XIII, 227—34, Tokyo, 1935.
- Myers, E. H. The Life History of *Patellina corrugata* Williamson a Foraminifer. Bull. Scripps Inst. of Oceanogr., La Jolla, Cal., T. S. III, 355—92, Berkeley, 1935.
- Myers, E. H. Morphogenesis of the Test and the biological significance of Dimorphism in the Foraminifer *Patellina corrugata* Williamson. Bull. Scripps Inst. of Oceanogr., La Jolla, Cal., T. S. III, 393—404, Berkeley, 1935.
- Nicholls, A. G. Copepods from the Interstitial Fauna of a Sandy Beach. Journ. Mar. Biol. Assoc., N. S. XX, 379—405, Plymouth, 1935.
- Philbert, M. Les Hydraires de la région moulouine. Bull. Inst. Océanogr., No. 673, Monaco, 1935.
- Philbert, M. Contribution à l'étude des Hydraires des îles Anglo-Normandes. Bull. Muséum Nation. d'Hist. Nat., 2ème Sér., VII, 85—88, Paris, 1935.
- Pirlot, J. M. Un grand Amphipode Hypéride, nouveau comme genre et comme espèce. Bull. Inst. Océanogr., No. 681, Monaco, 1935.
- Raabe, Z. *Rhynchophrya cristallina* g. n., sp. n. nouvelle forme d'Infusoire de la famille des *Sphaenophryidae* Chatton et Lwoff. Bull. Inst. Océanogr., No. 676, Monaco, 1935.
- Reid, D. M. The Range of the Sea-Urchin, *Echinus esculentus*. Journ. Animal Ecol., IV, 7—16, Cambridge, 1935.
- Renouf, L. P. W. Faunistic Notes from the Coast of Co. Cork, I. F. S. Ann. and Mag. Nat. Hist., 10th Ser., XVI, 212—214, London, 1935.
- Rivera, V. Primera Campaña biológica a bordo del "Xauen" en aguas de Mallorca (Abril 1933). Equinodermos. Trab. Inst. Español de Oceanogr., Núm. 6, 83—86, Madrid, 1934.
- Roux, J. Sur deux espèces de Palaemon provenant des Iles du Cap-Vert. Bull. Mus. Nation. d'Hist. Nat., 2ème Sér., VII, 180—96, Paris, 1935.
- Schulz, E. *Actinartus doryphorus* nov. gen. nov. spec., ein merkwürdiger Tardigrad aus der Nordsee. Zool. Anz., CXI, 285—88, Leipzig, 1935.
- Schulz, E. Die Orientierung des Nematodenkörpers und die halbsessile Lebensweise der frei lebenden Nematoden. Zool. Anz., CXI, 123—31, Leipzig, 1935.
- Seifert, R. Bemerkungen zur Artunterscheidung der deutschen Brackwasser-Hydrobrien. Zool. Anz., CX, 233—39, Leipzig, 1935.
- Shen, C. J. An investigation of the Post-Larval Development of the Shore-Crab *Carcinus maenas*, with special reference to the external secondary sexual characters. Proc. Zool. Soc. London, 1935, Part I, 1—34, 1935.
- Stiasny, G. Beiträge zur Kenntnis der Enteropneusten des Golfes von Neapel. Pubbl. Staz. Zool. di Napoli, XV, 71—105, Roma, 1935.
- Tarasov, N. I. Über eine wenig bekannte und seltene Form der Gattung *Lepas* (*Cirripedia thoracica*). Zool. Anz., CX, 326—30, Leipzig, 1935.

- Thiel, M. E. Zur Kenntnis der Hydromedusenfauna des Schwarzen Meeres. Zool. Anz., CXI, 161—74, Leipzig, 1935.
- Wesenberg-Lund, E. Priapulidae and Sipunculidae. The Danish Ingolf-Exped., IV, Part 7, Copenhagen, 1930.
- Westblad, E. Neue Beobachtungen über Protohydra. Zool. Anz., CXI, 152—58, Leipzig, 1935.
- Yonge, C. M. Origin and Nature of the Egg Case in the Crustacea. Nature, CXXXVI, 67—68, London, 1935.

### Fishery Investigations.

#### GENERAL

- Anon. The Woods Hole Oceanographic Institution, Report for the Year 1934.
- Anon. Problems Science is tackling. Fishing News, 17, Aberdeen, 14—IX—35.
- Arcidiacono, F. Contributo alla conoscenza della pesca dell'Alalonga nel basso Tirreno e nell'Ionio. Boll. Pesca, Piscicult. e Idrobiol., XI, 322—37, Roma, 1935.
- Buchanan-Wollaston, H. J. Statistical Tests. Nature, CXXXVI, 182—83, London, 1935.
- de Buen, F. Las Pescas realizadas durante las Campañas del Instituto Español de Oceanografía. Notas y Resúmenes, Ser. II, Núm. 79, Madrid, 1934.
- Crossland, C. The Marine Biological Station of the University of Egypt, at Ghardaqa (Hurghada) on the Red Sea. Bull. Faculty Sci., No. 3, Cairo, 1935.
- Dakin, W. J. R. M. Johnston Memorial Lecture: Science and Sea Fisheries with special reference to Australia. Pap. and Proc. Roy. Soc. Tasmania, 1934, 1—39, Hobart, 1935.
- International Council. Rapport Administratif (1934—1935). Cons. Perm. Internat. p. l'Explor. de la Mer, Rapp. et Proc.-Verb., XCIV, 2ème partie, Copenhagen, 1935.
- International Council. Procès-Verbaux (Mai 1935). Cons. Perm. Internat. p. l'Explor. de la Mer, Rapp. et Proc.-Verb., XCIV, 1ère partie, Copenhagen, 1935.
- Malpas, A. H. Administration Report of the Marine Biologist for the Year 1934. Colombo, 1935.
- Miraglia, L. Nuovo sistema di osservazione e di caccia subacquea. Boll. Pesca, Piscicult. e Idrobiol., XI, 255—316, Roma, 1935.
- Sund, O. Echo-Sounding in Fishery Research. Nature, CXXXV, 953, London, 1935.

#### COMMERCIAL FISHERIES

- Anon. Fishery Developments in Russia. Fishing News, 27—28, Aberdeen, 8-VI-35.
- Bartz, F. Die Fischereigebiete an der Westküste Afrikas. Fischmarkt, N. F. III, 144—47, Cuxhaven, 1935.
- Bower, W. T. Alaska Fishery and Fur-Seal Industries in 1934. Append. I to Rep. U. S. Comm. of Fish. for 1935, 1—73, Washington, D. C. 1935.
- Coulson, E. J. The Iodine Content of some American Fishery Products. U. S. Bureau of Fish., Invest. Rep. No. 25, Washington, D. C. 1935.
- Essipov, V. K. Bibliographical Index of Fisheries in the European North of the U. S. S. R., 1917—1933. Leningrad, 1935. (In Russian).
- Harrison, R. W., Pottinger, S. R., Lee, C. F. and Anderson, A. W. Studies on the Utilization of Swordfish Livers. U. S. Bureau of Fish., Invest. Rep. No. 28, Washington, D. C. 1935.
- Külper, W. Zur Lage der kleinen Küstenfischerei. Die deutsche Fischwirtschaft, 2. Jahrg., 577—80, Berlin, 1935.
- Laurinat, K. Die Krabbenfischerei, ein wichtiger Zweig der Küstenfischerei der Nordsee. Die deutsche Fischwirtschaft, 2. Jahrg., 562—63, Berlin, 1935.
- Lundbeck, J. Die Ertragsstatistik der Hochseefischerei als Mittel der wissenschaftlichen Fischereiforschung. Fischmarkt, N. F. III, 200—03, Cuxhaven, 1935.
- Metzner, H. Das Absatzproblem für Magerfische. Fischmarkt, N. F. III, 172—74, Cuxhaven, 1935.
- Samra, I. A. Rapports sur les Pêcheries d'Egypte en 1932. Direction des Recherches des Pêcheries, Le Caire, 1935.
- Spain. Estadística de Pesca, Año 1933. Madrid, 1934.
- Steuer, A. The Fishery Bottoms of Alexandria in Egypt. Research and Progress, I, 136—38, Berlin, 1935.
- Sweden. Fiske, År 1933. Sveriges Officiella Statistik, Stockholm, 1935.

## FISHING GEAR

- Herrington, W. C. Modifications in Gear to curtail the destruction of undersized Fish in Otter Trawling. U. S. Bureau of Fish., Invest. Rep. No. 24, Washington, D. C., 1935.
- Miyamoto, H. The Form of Amber-fish Keddle Net on the Basis of Model Experiments. Bull. Japan. Soc. Sci. Fish., IV, 153—57, Tokyo, 1935. (In Japanese, English Résumé).
- Peters, N. Angeln. Handb. der Seefischerei Nordeuropas (Lübbert und Ehrenbaum), IV, Heft 4, Stuttgart, 1935.
- Phillips, J. B. Experiment to determine the feasibility of the use of Trammel Nets in Monterey Bay. California Fish and Game, XXI, 138—48, Sacramento, 1935.
- Takenouti, Y. The Nature of the Fishing Net and its Application to the Broad Break of the Net. Bull. Japan. Soc. Sci. Fish., IV, 141—46, Tokyo, 1935. (In English).
- Uno, M. The Form and the Tension on Pursing Line of a Mackerel Ring-net used at Kosaitô, Tyôsen, as known by a Model Experiment. Bull. Japan. Soc. Sci. Fish., IV, 147—52, Tokyo, 1935. (In Japanese, English Résumé).

## Fish.

## GENERAL

- Aiyar, R. G. Observations on the Development of *Acentrogobius neilli* (*Gobius neilli* Day). Zool. Anz., CXI, 83—92, Leipzig, 1935.
- Andriashév, A. P. Übersicht der Gattung *Stelgistrum* Jordan und Gilbert (Pisces, Cottidae) nebst Beschreibung einer neuen Art aus dem Beringmeer. Zool. Anz., CXI, 289—97, Leipzig, 1935.
- Berg, L. S. Sur les unités taxonomiques chez les Poissons. Bull. Mus. Nation. d'Hist. Nat., 2ème Sér., VII, 79—84, Paris, 1935.
- Bruun, A. F. Flying-Fishes (Exocoetidae) of the Atlantic. Systematic and Biological Studies. Carlsberg Foundation's Oceanogr. Exped. round the World, 1928—30, etc. Dana Report No. 6, Copenhagen, 1935.
- Bruun, A. F. *Parexocoetus*, a Red Sea Flying Fish in the Mediterranean. Nature, CXXXVI, 553, London, 1935.
- de Buen, F. Primera Campaña biológica a bordo del "Xauen" en aguas de Mallorca (Abril 1933). Peces. Trab. Inst. Español de Oceanogr., Núm. 11, 87—89, Madrid, 1934.
- Desbrosses, P. Contribution à la connaissance de la Biologie du Rouget-Barbet en Atlantique Nord (II) *Mullus barbatus* (Rond) *surmuletus* (Fage). Rev. Trav. Office des Pêches Marit., VIII, 255—67, Paris, 1935.
- Fraser, J. H. The Fauna of the Liverpool Bay Shrimping Grounds and the Morecambe Bay Prawning Grounds as revealed by the use of a Beam Trawl. Proc. and Trans. Liverpool Biol. Soc., XLVIII, 65—78, 1935.
- Ghazzawi, F. M. The Pharynx and Intestinal Tract of the Egyptian Mullet — *Mugil cephalus* and *Mugil capito*. Part II. On the Morphology and Histology of the Alimentary Canal in *Mugil capito* (Tobar). Direction des Recherches des Pêcheries, Notes et Mém., No. 6, Le Caire, 1935.
- Goldschmidt, R. A Note on Amphioxides from Bermuda, based on Dr. W. Beebe's Collections. Biol. Bull., Woods Hole, Mass., LXIV, 321—25, 1933.
- Kahl, W. Einige Beobachtungen über den Stint. Fischmarkt, N. F. III, 147—51, Cuxhaven, 1935.
- Ninni, E. I *Callionymus* dei mari d'Europa con un' aggiunta di quelli esotici esistenti nei Musei d'Italia ed una nuova specie di "Callionymus" del Mar Rosso. Notas y Resúmenes, Ser. II, Núm. 85, Madrid, 1934.
- Norman, J. R. The Carangid Fishes of the Genus *Decapterus* Bleeker. Ann. and Mag. Nat. Hist., 10th Ser., XVI, 252—64, London, 1935.
- Roule, L. Nouvelles observations sur quelques espèces de Poissons abyssaux provenant de Madère. Bull. Inst. Océanogr. No. 674, Monaco, 1935.
- Soljan, T. *Blennius galerita* L., poisson amphibien des zones supralittorale et littorale exposées de l'Adriatique, Acta Adriatica, No. 2, Split, 1932.
- Tortonese, E. Elenco dei pesci italiani con annotazioni sistematiche. Boll. Pesca, Piscicolt. e Idrobiol., XI, 211—54, Roma, 1935.
- Wimpenny, R. S. and Faouzi, H. The Breeding of a Grey Mullet, *Mugil capito*, Cuv., in Lake Qarun, Egypt. Nature, CXXXV, 1041, London, 1935.

## PHYSIOLOGY AND BEHAVIOUR

- Alm, G. Plötsliga temperaturväxlingars inverkan på fiskar. Medd. från Statens undersöknings- och försöksanstalt för sötvattensfisket Nr. 6, Stockholm, 1935.
- Bernheim, F. Action of Drugs on the Isolated Intestine of certain Teleost Fish. Journ. Pharm. and Exper. Therapeutics, L, 216—22, Baltimore, 1934.
- Boury, M. et Schvinte, J. L'altération du poisson. Rev. Trav. Office des Pêches Marit., VIII, 282—334, Paris, 1935.
- Bowen, R. E. Movement of Sensory Hairs in the Ear. Proc. Nat. Acad. Sci., XXI, 233—34, Washington, D. C. 1935.
- Breder, C. M. The Reproductive Habits of the Common Catfish, *Ameiurus nebulosus* (Le Sueur) with a Discussion of their Significance in Ontogeny and Phylogeny. Zoologica, XIX, 143—85, New York, 1935.
- Bull, H. O. Studies on Conditioned Responses in Fishes. Part III. Wave Length Discrimination in *Blennius pholis* L. Part V. On the Controlling Influence of Normal Behaviour Traits upon Capacity to Form Experimental Conditioned Motor Responses under certain Conditions. Journ. Mar. Biol. Assoc., N. S. XX, 347—70, Plymouth, 1945.
- Dakin, W. J. and Edmonds, E. The regulation of the salt contents of the blood of aquatic animals, and the problem of the permeability of the bounding membranes of aquatic invertebrates. Austral. Journ. Exper. Biol. and Med. Sci., VIII, 169—87, Adelaide, 1931.
- Dakin, W. J. Presidential Address. The Aquatic Animal and its Environment. Proc. Linnæan Soc. N. S. Wales, LX, Parts 1—2, vii—xxxii, Sydney, 1935.
- Dawson, A. B. The Hemopoietic Response in the Catfish, *Ameiurus nebulosus*, to Chronic Lead Poisoning. Biol. Bull. Woods Hole, Mass., LXVIII, 335—46, 1935.
- Dobreff, M. Ein neues Versuchsobjekt zur unmittelbaren Erforschung des Blutkreislaufes und des Magendarmtraktes. Pubbl. Staz. Zool. di Napoli, XV, 120—22, Roma, 1935.
- Dyer, F. J. The relationship between the antimony trichloride blue value of cod-liver oils and that of their unsaponifiable fractions. Quart. Journ. Pharm. and Pharmacol., VI, 338—46, London, 1933.
- Dyer, F. J. and Wokes, F. The variation in colour-test value of commercial samples of cod-liver oil. Quart. Journ. Pharm. and Pharmacol., III, 417—26, London, 1930.
- Evans, H. M. The Brain of *Gadus*, with special reference to the *Medulla oblongata* and its variations according to the feeding habits of different Gadidae. 1. Proc. Roy. Soc. London, Ser. B, CXVII, 367—99, 1935.
- Holst, E. v. Über den Licht Rückenreflex bei Fischen. Pubbl. Staz. Zool. di Napoli, XV, 143—58, Roma, 1935.
- Ibanes, O. G. et Fontaine, M. Recherches sur les proteines du sérum sanguin de quelques poissons migrateurs. Bull. Inst. Océanogr., No. 679, Monaco, 1935.
- Jacobs, W. Über Laut-Erzeugung bei Fischen. Natur und Volk, LXV, 155—66, Frankfurt a. M. 1935.
- Keys, A. and Hill, R. M. The Osmotic Pressure of the Colloids in Fish Sera. Journ. Exper. Biol., XI, 28—34, London, 1934.
- Lovern, J. A. Fat metabolism in fishes. VII. The depot fats of certain fish fed on known diets. Biochem. Journ., XXIX, 1894—97, London, 1935.
- Maliatskij, S. M. Sur la question de la migration de quelques poissons de la Mer Noire (Préliminaire). Trav. Stat. Pisc. et Biol. de Géorgie, Vol. 1, Fasc. 1, 211—36, Batoum et Tiflis, 1934. (In Russian, French Résumé).
- Meador, R. G. The Optic System of the Teleost, *Holocentrus*. I. The Primary Optic Pathways and the Corpus Geniculatum Complex. Journ. Comp. Neurology, LX, 361—407, Philadelphia, 1934.
- Parker, G. H. An oil-soluble Neurohumour in the Catfish *Ameiurus*. Journ. Exper. Biol. XII, 239—45, London, 1935.
- Pottinger, S. R., Lee, C. F., Tolle, C. D. and Harrison, R. W. Chemical and Physical Properties of Haddock-Liver Oil and its Vitamin Content. U. S. Bureau of Fish., Invest. Rep. No. 27, Washington, D. C. 1935.
- Rygh, O. Non-identity of Vitamin D<sub>2</sub> (Irradiated Ergosterol, Calciferol) and the Natural Vitamin D from Cod Liver Oil. Nature, CXXXVI, 396—97, London, 1935.
- Sand, A. The comparative physiology of colour response in reptiles and fishes. Biol. Rev., X, 361—82, Cambridge, 1935.
- Scharrer, E. Über die Zwischenhirn drüse von *Cristiceps argentatus* G. Pubbl. Staz. Zool. di Napoli, XV, 123—31, Roma, 1935.
- Schlieper, C. Neuere Ergebnisse und Probleme aus dem Gebiet der Osmoregulation wasserlebender Tiere. Biol. Rev. X, 334—60, Cambridge, 1935.

- Sheehy, E. J. Note on the effect of storage on the colour and on the free fatty acid of a commercial sample of veterinary cod-liver oil. *Sci. Proc. Roy. Dublin Soc.*, XXI, N. S., 243—45, Dublin, 1935.
- Smith, D. C. Color Changes in the Isolated Scale Iridocytes of the Squirrel Fish, *Holocentrus ascensionis* (Osbeck). *Proc. Nat. Acad. Sci.*, XIX, 885—92, Washington, D. C. 1933.
- Sumner, F. B. and Fox, D. L. Studies of carotenoid pigments in fishes. II. Investigations of the effects of colored backgrounds and of ingested carotenoids on the xanthophyll content of *Girella nigricans*. *Journ. Exper. Zool.*, LXXI, 101—23, Philadelphia, 1935.
- Takahashi, T. Distribution of Trimethylaminoxide in the Piscine and Molluscan Muscles. *Bull. Japan. Soc. Sci. Fish.*, IV, 91—94, Tokyo, 1935. (In Japanese, English Résumé).
- Wells, N. A. The Influence of Temperature upon the Respiratory Metabolism of the Pacific Killifish, *Fundulus parvipinnis*. *Physiol. Zool.*, VIII, 196—227, Chicago, 1935.
- Yamamura, Y. Chemical Study of Food-Organisms for Fish. III. The Nephelometric Analysis of Zinc and its Distribution. *Bull. Japan. Soc. Scient. Fish.*, IV, No. 1, 6—8, Tokyo, 1935. (In Japanese, English Résumé).

## EGGS AND LARVAE

- Chambers, R. The Manner of Sperm Entry in Various Marine Ova. *Journ. Exper. Biol.*, X, 130—41, London, 1933.
- Chase, H. Y. The Origin and Nature of the Fertilization Membrane in Various Marine Ova. *Biol. Bull.*, Woods Hole, Mass., LXIX, 159—84, 1935.
- Kagan, B. M. The Fertilizable Period of the Eggs of *Fundulus heteroclitus* and some Associated Phenomena. *Biol. Bull.*, Woods Hole, Mass., LXIX, 185—201, 1935.
- Russell, F. S. The Seasonal Abundance and Distribution of the Pelagic Young of Teleostean Fishes caught in the Ring-trawl in Offshore Waters in the Plymouth Area. Part II. *Journ. Mar. Biol. Assoc.*, N. S. XX, 147—79, Plymouth, 1935.

## FISH PARASITES AND DISEASES

- Heinemann, E. Über den Wurmstar bei Fischen. *Fischerei-Zeitung*, XXXVII, Nr. 26, Neudamm, 1934.
- Ladreyt, F. Sur un Epithélioma de la muqueuse palatine chez une Murène (*Muraena helena* L.) avec quelques observations sur l'évolution des basales, des membranes cellulaires et du stroma dans certains Cancers. Absence de glande vénimeuse palatine chez la Murène. *Bull. Inst. Océanogr.* No. 677, Monaco, 1935.
- Leigh-Sharp, W. H. *Anchistrotos laquens* n. sp. A parasitic copepod of *Serranus cabrilla*. *Parasitology*, XXVII, 266—69, Cambridge, 1935.
- Leigh-Sharp, W. H. Two copepods (*Lernaenicus*) parasitic on Clupea. *Parasitology*, XXVII, 270—75, Cambridge, 1935.
- Nybelin, O. Untersuchungen über den bei Fischen Krankheitserregenden Spaltpilz *Vibrio anguillarum*. *Medd. från Statens undersöknings- och försöksanstalt för sötvattensfisket*, Nr. 8, Stockholm, 1935.
- Österholm, B. Två parasitsjukdomar hos fisk. *Fiskeritidskr. för Finland*, Årg. 42, No. 6—7, Helsinki, 1935.
- Timon-David, J. Sur les *Wedlia* parasites de l'estomac du Thon (Trématodes, Didymozoonidae). *Bull. Inst. Océanogr.*, No. 670, Monaco, 1935.

## FOOD OF FISH

- Soljan, T. und Karlovac, O. Untersuchungen über die Ernährung der adriatischen *Scorpaena*-Arten. *Acta Adriatica*, No. 1, Split, 1932.
- Valiani, S. Contributo allo studio dell'alimentazione dei pesci (*Scorpaena porcus* L. e *Scorpaena scrofa* L.). *Boll. Pesca, Piscicoltura e Idrobiologia*, XI, 413—23, Roma, 1935.
- Yamamura, Y. Chemical Study of Food-Organisms for Fish. IV. Distribution of Arsenic. *Bull. Japan. Soc. Sci. Fish.*, IV, 85—87, Tokyo, 1935. (In Japanese, English Résumé).

## AQUARIUM EQUIPMENT

- Walton-Smith, F. G. An Apparatus for Rearing Marine Organisms in the Laboratory. *Nature*, CXXXVI, 345—46, London, 1935.

## PLAICE AND OTHER PLEURONECTIDS

- Anon. Verpflanzung von Nordseeschollen in die Ostsee. Fischmarkt, N. F. III, 151—57, Cuxhaven, 1935.
- Furnestin, J. „La Cardine“. Résumé des connaissances acquises sur la Biologie de ce Poisson. Rev. Trav. Office des Pêches Marit., VIII, 203—49, Paris, 1935.
- Meyer, P. F. Die deutsche Schollen-Fischerei in der Ostsee muss wieder ertragreich werden. Die deutsche Fischwirtschaft, 2. Jahrg., 515—17, Berlin, 1935.
- Molander, A. R. Further data concerning the witch (*Pleuronectes cynoglossus* L.). Svenska Hydrogr.-Biol. Komm. Skr., N. S. Biol. I, Nr. 6, Stockholm, 1935.
- Nybelin, O. Über Eier und Larven der Rotzunge (*Pleuronectes cynoglossus* L.). Svenska Hydrogr.-Biol. Komm. Skr., N. S. Biol. I, Nr. 7, Stockholm, 1935.
- Schnakenbeck, W. Die biologischen Grundlagen für die Fischerei in der Niederelbe. 5. Der Butt. Fischmarkt, N. F. III, 174—76, Cuxhaven, 1935.
- Thursby-Pelham, D. E. Can Flat Fish live after the Trawl has caught them? Fishing News, 8, Aberdeen, 7—IX—35.

## COD

- Hansen, P. M., Jensen, A. J. and Tåning, Å. V. Cod Marking Experiments in the Waters of Greenland 1924—1933. Medd. Komm. Danmarks Fisk.- og Havunders., Ser. Fisk., X, Nr. 1, København, 1935.
- Järvi, T. H. Havaintoja harjusten koosta, iästä ja kasvusta. Suomen Kalastuslehti, V. 42, No. 5, 117—23, Helsinki, 1935.
- Leim, A. H. Cod and Haddock Tagging. Progress Rep., Atlantic Biol. Stat., St. Andrew's, N. B., No. 15, 3, 1935.
- Sund, O. Echo-Sounding in Fishery Research. Nature, CXXXV, 953, London, 1935.

## HADDOCK

- Leim, A. H. Cod and Haddock Tagging. Progress Rep., Atlantic Biol. Stat., St. Andrew's, N. B., No. 15, 3, 1935.
- Vladykov, V. D. Haddock Races along the North American Coast. Progress Rep., Atlantic Biol. Stat., St. Andrew's, N. B., No. 14, 3—7, 1935.
- Vladykov, V. D. and Homans, R. E. S. Do Haddock feed during the Spawning Period? Progress Rep., Atlantic Biol. Stat., St. Andrew's N. B., No. 15, 9—11, 1935.

## WHITING

- Gray, J. Studies in Animal Locomotion: III. The Propulsive Mechanism of the Whiting (*Gadus merlangus*). Journ. Exper. Biol., X, 391—400, London, 1933.

## HAKE

- Belloc, G. Étude monographique du merlu (*Merluccius merluccius*), 3e partie. Rev. Trav. Office des Pêches Marit., VIII, 145—202, Paris, 1935.
- Hickling, C. F. L'important problème de la pêche du merlu. Pêche Marit., Pêche Fluviale et Piscicult., XVIII, 235—38, Paris, 1935.
- Hickling, C. F. Seasonal Changes in the Ovary of the Immature Hake, *Merluccius merluccius* L. Journ. Mar. Biol. Assoc., N. S. XX, 443—61, Plymouth, 1935.

## TUNNY

- Kimura, K. Statistical Analysis of the Catch by Kettle Nets, along the coast of Suruga Bay. Rec. Oceanogr. Works in Japan, VII, 1—36, Tokyo, 1935.
- Uda, M. On the Estimation of Favourable Temperature for Longline Fishing of Tunny. Bull. Japan. Soc. Sci. Fish., IV, 61—65, Tokyo, 1935. (In Japanese, English Résumé).

## HERRING

- Daniel, R. J. Presidential Address, 1935: "Herrings". (Abstract). Proc. and Trans. Liverpool Biol. Soc., XLVIII, 4—11, 1935.
- Le Gall, J. Le Hareng *Clupea harengus* Linné. 1. Les populations de l'Atlantique Nord-Est. Ann. de l'Inst. Océanogr., N. S. XV, 1—216, Paris, 1935.
- Jespersen, P. Undersøgelser over Aarsagen til Svingningerne i Sildefiskeriets Udbytte. Dansk Fiskeritidende, København, 1935.

- Lundbeck, J. Age and Development of Sea Fish. Fishing News, 22, Aberdeen, 8—VI—35.
- Rounsefell, G. A. and Dahlgren, E. K. Races of Herring, *Clupea pallasii* in southeastern Alaska. Bull. Bureau of Fish., XLVIII, No. 17, 119—41, Washington, D. C. 1935.

## PILCHARD, SPRAT AND ANCHOVY

- Le Gall, J. Un aspect du problème sardinier. Le côté scientifique de la question. Pêche Marit., Pêche Fluviale et Piscicult., XVIII, 313—14, 354—56, Paris, 1935.
- Hurequin, L. Les conserves de sardines. Pêches Marit., Pêche Fluviale et Piscicult., XVIII, 243—45, Paris, 1935.

## EELS

- Bertin, L. Exposés de biologie zoologique, 2: Migrations et Métamorphoses de l'anguille d'Europe. Actualités Sci. et Industr., 264, Paris, 1935.
- Bertin, L. Les larves de Poissons Apodes dans les oeuvres imprimées et manuscrites de Risso. Bull. Mus. Nation. d'Hist. Nat., 2ème Sér., VII, 178—82, Paris, 1935.
- Boucher-Firly, S. Recherches biochimiques sur les Téléostéens Apodes (Anguille, Congre, Murène). Ann. de l'Inst. Oceanogr. N. S. XV, 217—327, Paris, 1935.
- Gray, J. Studies in Animal Locomotion: II. The Relationship between Waves of Muscular Contraction and the Propulsive Mechanism of the Eel. Journ. Exper. Biol., X, 386—90, London, 1933.
- Hornoyd, A. G. Le sexe et la croissance de la petite Anguille jaune du marais de la Grand Mar (Camarque). Bull. Soc. Centr. d'Aquicult. et de Pêche, XLII, 73—84, Paris, 1935.
- Otterstrøm, C. V. Aalekisterne og de nedadvandrende Ørreder. Ferskvandsfiskeribladet, XXXII, Nr. 12, København, 1934.
- Schmidt, J. Danish Eel Investigations during 25 years (1905—1930). Excerpt in translation from „Danas Togt omkring Jorden 1928—1930” published by the Carlsberg Foundation's Oceanogr. Exped. round the World, 1928—30, etc., Copenhagen, 1935.

## FRESHWATER FISH

- Awerinzew, S. und Awerinzewa, N. S. Zur Biologie einiger Vertreter der Salmoniden-Familie aus dem Unterlaufe des Flusses Lena. Internat. Rev. d. ges. Hydrobiol. usw., XXXII, 49—102, Leipzig, 1935.
- Delpino, I. La diffusione e la distribuzione in Italia della *Trutta genivittata* Heckel-Kner, 1858). Boll. Pesca, Piscicult. e Idrobiol., XI, 196—210, Roma, 1935.
- England. Salmon and Freshwater Fisheries. Report for the Year 1934. Min. of Agric. and Fish., London, 1935.
- Hile, R. and Deason, H. J. Growth of the Whitefish, *Coregonus clupeaformis* (Mitchill), in Trout Lake, Northeastern Highlands, Wisconsin. Trans. Amer. Fish. Soc., LXIV, 231—37, Washington, D. C. 1934.
- Ilyin, M. D. Chemical Composition of the Char of Novaya Zemlya (*Salvelinus alpinus* L.). Trans. Arctic Inst., XVII, 107—14, Leningrad, 1935. (In Russian, English Résumé).
- Järvi, T. H. Merilohen kulkusuunnista Itämeressä. Suomen Kalastuslehti, 42 Vuosik, No. 8, 157—66, Helsinki, 1935.
- Katayama, M. Biometric Study of Dog Salmon, *Oncorhynchus keta* (Walbaum). Bull. Japan. Soc. Sci. Fish., IV, 171—73, Tokyo, 1935. (In Japanese, English Résumé).
- Kirpischnikoff, W. Biologisch-systematische Beschreibung des Stints des Weissen Meeres, des Tschetsky-Meerbusens und des Flusses Petchora. Trans. U. S. S. R. Inst. of Fish. and Oceanogr. (Vniro), II, 103—94, Moscow, 1935. (In Russian, German Résumé).
- Leach, G. C. and James, M. C. Propagation and Distribution of Food Fishes, Fiscal Year 1934. Append. IV to Rep. of Comm. Fish. for 1934, Washington, D. C. 1934.
- Marquard, O. Beitrag zur Lachsfrage im Ostseegebiet. Die deutsche Fischwirtschaft, II, 466, Berlin, 1935.
- Monastyrsky, G. On the State of Raw Resource of the Salmon in the North Fisheries District. Trans. U. S. S. R. Inst. of Fish. and Oceanogr. (Vniro), II, 3—59, Moscow, 1935. (In Russian, English Résumé).
- Nall, G. H. The Sea Trout of Mull. Fish. Board for Scotland, Salmon Fish., 1935, No. 1, Edinburgh, 1935.

- Otterstrøm, C. V. Laks og Ørred. Ferskvandsfiskeribladet, XXXIII, Nr. 4, København, 1935.
- Otterstrøm, C. V. Planmæssig Udsætning af Ørredyngel i Vandløb. Lyngby, 1935.
- Retovsky, L. O. The feeding of the Char of Novaya Zemlya (*Salvelinus alpinus* L.). Trans. Arctic Inst., XVII, 89—105, Leningrad, 1935. (In Russian, English Résumé).
- Slashtnikov, G. The Char of Novaya Zemlya, its age and rate of growth. Trans. Arctic Inst., XVII, 71—88, Leningrad, 1935. (In Russian, English Résumé).
- Wiese, A. Beitrag zur Lebensgeschichte der Grossen Maräne. Internat. Rev. d. ges. Hydrobiol. usw., XXXII, 137—63, Leipzig, 1935.
- Yessipov, W. K. Materials of the life history and fishery of the Char of Novaya Zemlya (*Salvelinus alpinus* L.). Trans. Arctic Inst., XVII, 5—70, Leningrad, 1935. (In Russian, English Résumé).

## FRESHWATER AND POLLUTION

- Vouga, M. La pollution des eaux; les problèmes qu'elle comporte: leur solution pratique. Orléans, 1935.

## Oysters and other Lamellibranchs.

- Ankel, W. E. Die Pantoffelschnecke ein Schädling der Auster. Natur und Volk, LXV, 173—76, Frankfurt a. M. 1935.
- Anon. Oysters' Marvellous Mechanism. Dr. Orton's Buckland Lectures. No. 1. Fishing News, 16, Aberdeen, 15—VI—35.
- Anon. History and Habits of Shellfish. Fishing News, 8, Aberdeen, 13—VII—35.
- Berner, L. La Reproduction des Moules comestibles (*Mytilus edulis* L. et *Mytilus gallo-provincialis* Lmk.) et leur répartition géographique. Bull. Inst. Océanogr. No. 680, Monaco, 1935.
- Cole, H. A. On some larval Trematode Parasites of the Mussel (*Mytilus edulis*) and the Cockle *Cardium edule*. Parasitology, XXVII, 276—80, Cambridge, 1935.
- Dalmon, J. Note sur la Biologie du Pétoncle (*Chlamys varia* L.). Rev. Trav. Office des Pêches Marit., VIII, 268—81, Paris, 1935.
- Fischer-Piette, E. Histoire d'une moulière. Observations sur une phase de déséquilibre faunique. Bull. Biol. de la France et de la Belgique, LXIX, Fasc. 2, Paris, 1935.
- Matheson, C. The Oyster Fishery at Mumbles, Glamorgan. Trans. Cardiff Naturalists' Soc., LXVI, 81—86, Cardiff, 1933.
- Needler, A. W. H. Rearing Separate Oyster Spat on Trays. Bull. Biol. Board Canada, XLVIII, Ottawa, 1935.
- Nikitin, V. N. The Gudaut Oyster Bank. Trav. Stat. Pisc. et Biol. de Géorgie, Vol. 1, Fasc. 1, 51—179, Batoum et Tiflis, 1934. (In Russian, English Résumé).
- Orton, J. H. Shellfish and their Cultivation. Fishing News, 26, Aberdeen, 6—VII—35.
- Orton, J. H. On the Biological Condition of Relaid Oysters, 1935. Econom. Proc. Roy. Dublin Soc., II, 533—40, Dublin, 1935.
- Orton, J. H. Biology of Shell-Movements of the Oyster. Science, LXXXII, 105—06, New York, 1935.
- Thompson, S. H. and Weymouth, F. W. Condition of Razor Clam Fishery in vicinity of Cordova, Alaska. U.S. Bureau of Fish., Invest. Rep., No. 29, Washington, D. C. 1935.
- Tohyama, Y. The Bacteriological Analysis of Japanese Oysters. Bull. Jap. Soc. Sci. Fish., IV, 75—78, Tokyo, 1935. (In English).
- Tohyama, Y. and Yasukawa, Y. Purification of Polluted Oysters. Bull. Japan. Soc. Sci. Fish., IV, 176—82, Tokyo, 1935. (In Japanese, English Résumé).

## CRUSTACEA

- Anon. Le transport des homards vivants. Pêche Marit., Pêche Fluviale et Piscicult., XVIII, 278, Paris, 1935.
- Bonde, C. von and Marchand, J. M. The Natural History and Utilization of the Cape Crawfish, Kreef or Spiny Lobster, *Jasus (Palinurus) lalandii* (Milne Edwards) Ortmann. Union of South Africa, Fisheries and Mar. Biol. Survey Div., Fishery Bull. No. 1, Pretoria 1935.
- Pasquin, J. Quelques connaissances sur la langouste. Industrias Pesqueras, Mai, Madrid, 1935.
- Smith, W. C. Growth of the Young Lobster (*Homarus vulgaris*). Proc. and Trans. Liverpool Biol. Soc., XLVIII, 51—60, 1935.



- Smith, W. C. and Cregeen, T. N. An experiment in Lobster Rearing. Proc. and Trans. Liverpool Biol. Soc., XLVIII, 61—64, 1935.
- Sugano, S. The Shoreward Migration of Japanese King Crabs at a Fishing Ground In Western Kamtchatka. Bull. Jap. Soc. Sci. Fish., IV, 98—100, Tokyo, 1935. (In Japanese, English Résumé).

#### Whales and Seals.

- Fraser, F. C. Report on Cetacea stranded on the British Coasts from 1927 to 1932. No. 11. British Museum (Nat. Hist.) London, 1934.
- Hart, J. On the Diatoms of the Skin Film of Whales, and their possible bearing on problems of Whale Movements. Discovery Rep., X, 247—82, Cambridge, 1935.
- Irving, L. The Protection of Whales from the danger of Caisson Disease. Science, LXXXI, 560—61, New York, 1935.
- Klem, A. Contributions to the Study of Whale Oils. Studies in the Biochemistry of Whale Oils. Hvalrådets Skr., Nr. 11, 49—108, Oslo, 1935.
- Matsuura, Y. The Distribution and Habits of Humpback Whales in the adjacent water of Japan. Bull. Japan. Soc. Sci. Fish., IV, 161—70, Tokyo, 1935. (In Japanese, English Résumé).
- Mayorowa, A. A. et Danilevskij, N. N. Matériaux sur la biologie du dauphin de la Mer Noire. Trav. Stat. Pisc. et Biol. de Géorgie, Vol. I, Fasc. 1, 181—210, Batoum et Tiflis, 1934. (In Russian, French Résumé).
- Schnakenbeck, W. Walfang und Wale. Fischmarkt, N. F. III, 203—13, Cuxhaven 1935.
- Tveraen, I. Contributions to the Study of Whale Oils. Chemical Analysis of Samples of Blue Whale Oils. Hvalrådets Skr., Nr. 11, 5—48, Oslo, 1935.

#### Biological-Miscellaneous.

- Berrill, N. J. Cell Division and Differentiation in Asexual and Sexual Reproduction. Journ. of Morphol., LVII, 353—427, 1935.
- Broch, H. Einige Probleme der biogeographischen Abgrenzung der arktischen Region. Mitteil. Zool. Mus. Berlin, XIX, 1—20, 1933.
- Metcalf, Z. P. A Text-book of Economic Zoology. London, 1931.
- Nicol, E. A. T. The Ecology of a Salt-Marsh. Journ. Mar. Biol. Assoc., N. S. XX, 203—61, Plymouth, 1935.
- Schott, G. Geographie des Indischen und Stillen Ozeans. Hamburg, 1935.
